# Supplementary material for: Antibiotic-Resistant Bacteria in Green Turtle (Chelonia mydas) Rearing Seawater
Source: MDPI journal article supplement (doi:10.3390/ani11061841), 2021-06-21
Supplement: s1 [file s1]

## Article

# Antibiotic-Resistant Bacteria in Green Turtle (*Chelonia mydas*) Rearing Seawater

Thanaporn Chuen-Im <sup>1,\*</sup>, Koraphan Sawetsuwannakun <sup>1</sup>, Pimnapar Neesanant <sup>2</sup> and Nakarin Kitkumthorn <sup>3</sup>

**Table S1.** Total plate counts (log CFU/mL) and antibiotic resistant bacteria detected in coastal seawater and rearing seawater from the turtle holding tanks \*.

| Total plate count **<br>(log CFU/mL)                                                                        | Antimicrobia<br>1<br>susceptibility |            |          |            |              |                 |            |            |             |
|-------------------------------------------------------------------------------------------------------------|-------------------------------------|------------|----------|------------|--------------|-----------------|------------|------------|-------------|
|                                                                                                             |                                     | Gentamicin | Amikacin | Tobramycin | Tetracycline | Chloramphenicol | Ampicillin | Penicillin | Amoxicillin |
| Antibiotic resistant isolates from coastal seawater using as water supply (isolates)                        |                                     |            |          |            |              |                 |            |            |             |
| 2.85                                                                                                        | Resistant                           | 0          | 0        | 0          | 2            | 1               | 12         | 10         | 9           |
|                                                                                                             | Intermediate                        | 0          | 1        | 1          | 0            | 0               | 0          | 2          | 0           |
|                                                                                                             | Susceptible                         | 16         | 15       | 15         | 14           | 15              | 4          | 4          | 7           |
|                                                                                                             | Total                               | 16         | 16       | 16         | 16           | 16              | 16         | 16         | 16          |
| Antibiotic resistant isolates from seawater that kept juvenile green turtles in the holding tank (isolates) |                                     |            |          |            |              |                 |            |            |             |
| 3.41                                                                                                        | Resistant                           | 0          | 0        | 2          | 6            | 2               | 28         | 25         | 25          |
|                                                                                                             | Intermediate                        | 0          | 5        | 3          | 1            | 5               | 1          | 0          | 2           |
|                                                                                                             | Susceptible                         | 33         | 28       | 28         | 26           | 26              | 4          | 8          | 6           |
|                                                                                                             | Total                               | 33         | 33       | 33         | 33           | 33              | 33         | 33         | 33          |

\* The preliminary study conducted during the end of 2014. \*\* NA + 3%NaCl.
